# Supplementary material
Source: PubMed Central journal article supplement (PMC4743556)

**SUPPLEMENTAL MATERIAL**

**Supplement Table 1: Descriptive statistics of stent thrombosis, gender, race, and age by stent type**

| Stent Type     | Stent Thrombosis | Gender        | Race              | Age (mean± SD) |
|----------------|------------------|---------------|-------------------|----------------|
| BMS (n=446)    | ST (n =15)       | Male (n=15)   | Caucasian (n=11)  | 64.00 ± 8.72   |
|                |                  |               | Black (n=3)       | 59.00 ± 7.00   |
|                |                  |               | Hispanic (n=1)    | 60.00 ± ---    |
|                |                  | Female (n=0)  | Caucasian (n=0)   | ---            |
|                |                  |               | Black (n=0)       | ---            |
|                |                  |               | Hispanic (n=0)    | ---            |
|                | No ST (n =431)   | Male (n=351)  | Caucasian (n=232) | 65.28 ± 8.68   |
|                |                  |               | Black (n=89)      | 60.61 ± 9.46   |
|                |                  |               | Hispanic (n=28)   | 66.28 ± 10.51  |
|                |                  |               | Other (n=2)       | 54.00 ± 4.24   |
|                |                  | Female (n=80) | Caucasian (n=39)  | 65.56 ± 12.04  |
|                |                  |               | Black (n=30)      | 60.23 ± 7.78   |
|                |                  |               | Hispanic (n=10)   | 64.80 ± 10.36  |
|                | Other (n=1)      | 71.00 ± ---   |                   |                |
| Supera™ (n=43) | ST (n =3)        | Male (n=3)    | Caucasian (n=2)   | 67.00 ± 8.48   |
|                |                  |               | Black (n=1)       | 62.0 ± ---     |
|                |                  |               | Hispanic (n=0)    | ---            |
|                |                  |               | Other (n=0)       | ---            |
|                |                  | Female (n=0)  | Caucasian (n=0)   | ---            |
|                |                  |               | Black (n=0)       | ---            |
|                |                  |               | Other (n=0)       | ---            |
|                |                  |               | Hispanic (n=0)    | ---            |
|                | ST (n =40)       | Male (n=3)    | Caucasian (n=29)  | 67.24 ±9.36    |
|                |                  |               | Black (n=5)       | 67.00 ± 4.89   |
|                |                  |               | Hispanic (n=2)    | 77.00 ± 11.31  |
|                |                  |               | Other (n=0)       | ---            |
|                |                  | Female (n=4)  | Caucasian         | 61.00 ± 7.07   |

|                                             |               |                    |                     |               |
|---------------------------------------------|---------------|--------------------|---------------------|---------------|
|                                             |               |                    | (n=2)               |               |
|                                             |               |                    | Black (n=2)         | 62.00 ± 8.48  |
|                                             |               |                    | Other (n=0)         | ---           |
|                                             |               |                    | Hispanic (n=0)      | ---           |
| Viabahn™<br>(n=47)                          | ST (n =5)     | Male (n=5)         | Caucasian<br>(n=4)  | 59.00 ± 4.69  |
|                                             |               |                    | Black (n=1)         | 65.00 ± ---   |
|                                             |               |                    | Hispanic (n=0)      | ---           |
|                                             |               |                    | Other (n=0)         | ---           |
|                                             |               | Female (n=0)       | Caucasian<br>(n=0)  | ---           |
|                                             |               |                    | Black (n=0)         | ---           |
|                                             |               |                    | Hispanic (n=0)      | ---           |
|                                             |               |                    | Other (n=0)         | ---           |
|                                             | No ST (n =41) | Male (n=6)         | Caucasian<br>(n=27) | 65.00 ± 5.44  |
|                                             |               |                    | Black (n=10)        | 64.90 ± 10.13 |
|                                             |               |                    | Hispanic (n=1)      | 57.00 ± ---   |
|                                             |               |                    | Other (n=0)         | ---           |
| Female (n=3)                                |               | Caucasian<br>(n=3) | 59.33 ± 17.67       |               |
|                                             |               | Black (n=0)        | ---                 |               |
|                                             |               | Hispanic (n=0)     | ---                 |               |
|                                             |               | Other (n=0)        | ---                 |               |
| Zilver PTX™<br>drug coated<br>Stents (n=68) | ST (n =3)     | Male (n=2)         | Caucasian<br>(n=1)  | 56.00 ±       |
|                                             |               |                    | Black (n=1)         | 65.00 ± ---   |
|                                             |               |                    | Hispanic (n=0)      | ---           |
|                                             |               |                    | Other (n=0)         | ---           |
|                                             |               | Female (n=1)       | Caucasian<br>(n=0)  | ---           |
|                                             |               |                    | Black (n=1)         | 61.00 ± ---   |
|                                             |               |                    | Hispanic (n=0)      | ---           |
|                                             |               |                    | Other (n=0)         | ---           |
|                                             | No ST (n=65)  | Male (n=48)        | Caucasian<br>(n=33) | 65.81 ± 10.69 |
|                                             |               |                    | Black (n=9)         | 59.33 ± 5.500 |
|                                             |               |                    | Hispanic (n=4)      | 65.75 ± 4.03  |
|                                             |               |                    | Other (n=2)         | 56.50 ± 3.53  |
|                                             |               | Female (n=17)      | Caucasian<br>(n=11) | 62.09 ± 12.24 |
|                                             |               |                    | Black (n=3)         | 65.00 ± 10.81 |
| Hispanic (n=3)                              |               |                    | 65.66 ± 11.93       |               |
|                                             |               |                    |                     |               |

|  |  |  |             |     |
|--|--|--|-------------|-----|
|  |  |  | Other (n=0) | --- |
|--|--|--|-------------|-----|

**Supplemental Figure 1: Kaplan-Meier curves: Stent Thrombosis (ST) by stent type (post 12 months)**

Censored at death and follow up months < 12 year; BMS= Bare metal stent; DCS= Drug coated stent; SUP= Supera vascular mimetic stent; VIA= Viabahn™ self-expanding stent graft. Frailty model adjusted for age, ABI, diabetes mellitus ,CLI, CAD, smoking status; DCS vs. BMS HR=1.06 p=0.9317; SUP vs. BMS HR=1.10 p=0.9005; VIA Vs BMS HR=1.28 p=0.7341

**Supplemental Figure 2: Kaplan-Meier curves: Stent Thrombosis (ST) by CTO (post 12 months)**

Censored at death and follow up months < 12 year; CTO = Chronic total occlusion  
Frailty model adjusted for age, ABI, diabetes mellitus ,CLI, CAD, smoking status;  
CTO vs. No CTO HR=1. 22 p=0.6467

### Kaplan-Meier Curves: ST by stent types

With Number of Subjects at Risk

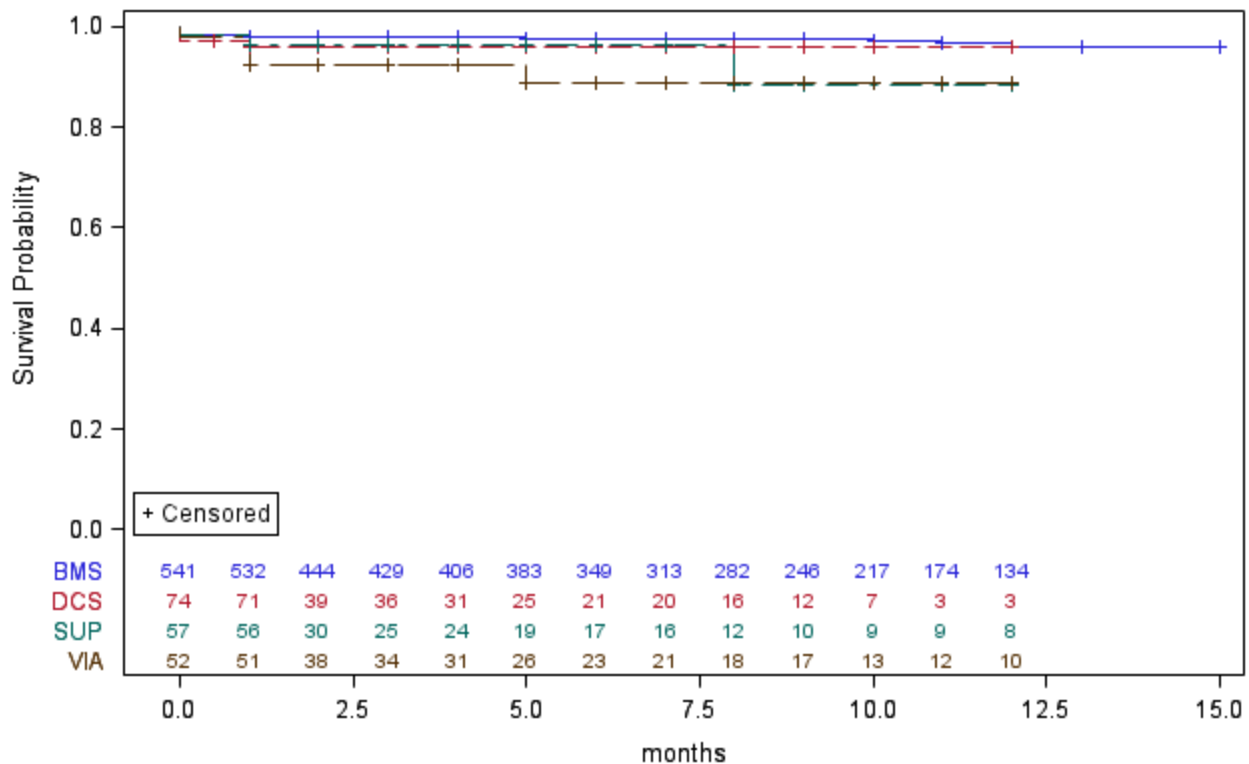

Stent Types — BMS — DCS — SUP — VIA

### Kaplan-Meier Curves: ST between CTO and No CTO groups

With Number of Subjects at Risk

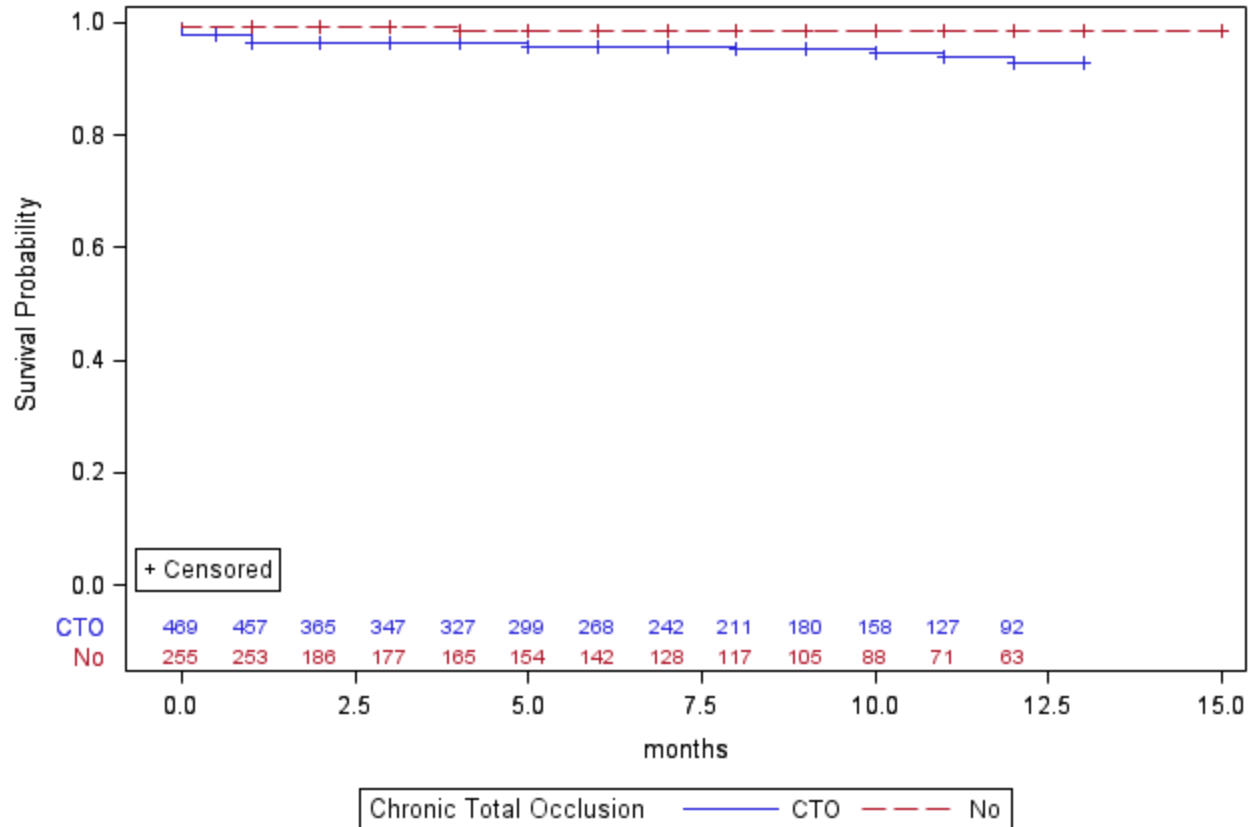

Supplement: NIHMS749216-supplement-Supplemental_Material.pdf [file NIHMS749216-supplement-Supplemental_Material.pdf]
